# Supplementary material
Source: publisher figshare collection journal article supplement (https://karger.figshare.com/ndownloader/files/23167325)
Supplement: Supplementary file 1 [file 23167325]

Supplement online 1**:** Baseline characteristics (unmatched analysis)

|  | Unadjusted Analysis | | |
| --- | --- | --- | --- |
|  | Short  n= 321 | Long  n= 73 | P-Value |
| Age (years), mean ± SD | 71.1 ± 13.5 | 72.8 ± 14.9 | 0.154 |
| Sex (male) | 165 (51.4%) | 29 (39.7%) | 0.072 |
| Arterial hypertension | 180 | 29 | 0.269 |
| Atrial fibrillation | 142 | 21 | 0.810 |
| Diabetes | 43 | 8 | 0.444 |
| Coronary artery disease | 74 | 14 | 0.245 |
| Peripheral artery disease | 20 | 2 | 1.0 |
| Smoking | 35 | 6 | 0.657 |
| Missing | 54 | 35 |  |
| Baseline NIHSS, mean ± SD | 15.6 ± 7.6 | 16.8 ± 7.0 | 0.164 |
| IVT | 185 (57.6%) | 35 (47.9%) | 0.132 |
| **Occlusion site** | | | 0.004 |
| ICA | 40 (12.5%) | 21 (28.8%) |  |
| M1 | 175 (54.4%) | 39 (53.4%) |  |
| M2 | 28 (8.7%) | 4  (5.5%) |  |
| BA | 71 (22.1%) | 9 (12.3%) |  |
| PCA | 7 (2.2%) | 0 (0%) |  |
| **Stent Retriever** | | | <0.001 |
| Trevo | 117 (36.4%) | 7  (9.6%) |  |
| Solitaire | 204 (63.6%) | 66 (90.4%) |  |

BA: basilar artery; ICA: internal carotid artery; IVT: intravenous thrombolysis; NIHSS: National Institutes of Health stroke scale; PCA: posterior cerebral artery; SD: standard deviation;
